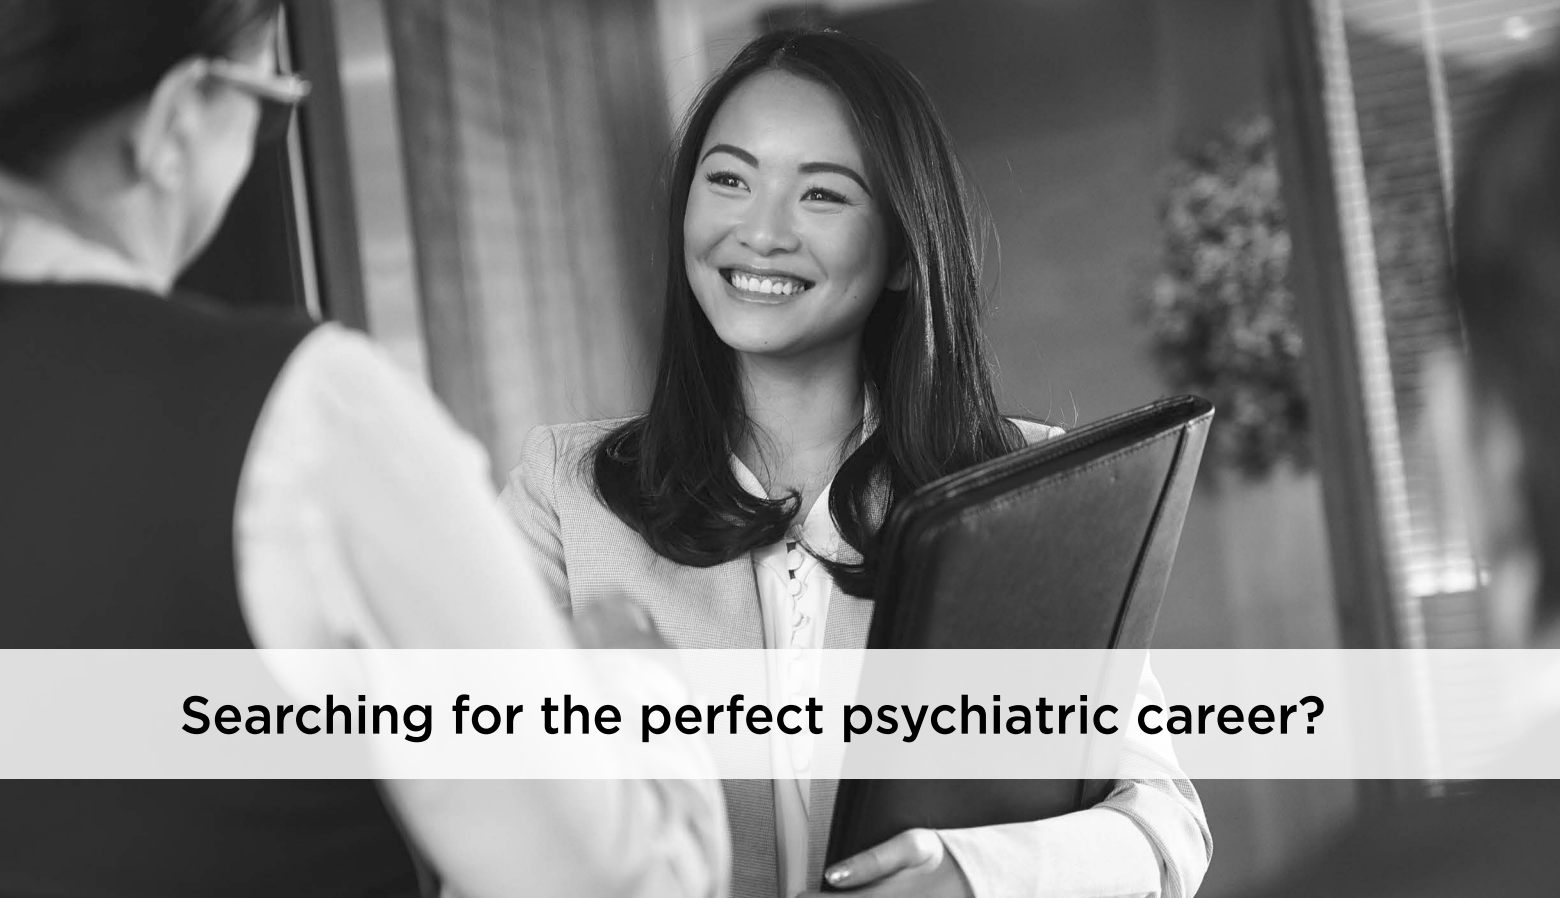

**Searching for the perfect psychiatric career?**

## **Let APA JobCentral help!**

### **MANAGE YOUR CAREER**

- Browse hundreds of active job listings!
- Create an account to save jobs, store multiple resumes and cover letters and communicate with employers through our internal messaging system.
- Set up multiple job alerts specifying your skills, interests and location to receive e-mails when employers post jobs that match your criteria.

### **RECRUIT FOR OPEN POSITIONS**

- Post your job in front of thousands of highly qualified psychiatrists.
- Cross promote your job listing in Psychiatric News.
- Search the anonymous resume database to find your ideal candidate.

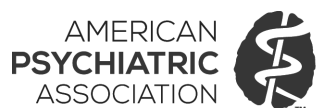

**JOBCENTRAL**  
The Career Hub for Psychiatry

**[jobs.psychiatry.org](http://jobs.psychiatry.org)**

# PSYCHIATRYonline

Your Destination for Lifelong Learning in Psychiatry

The one-stop resource for information on diagnosis, treatment, guidelines, the latest research, and breaking news from the field.

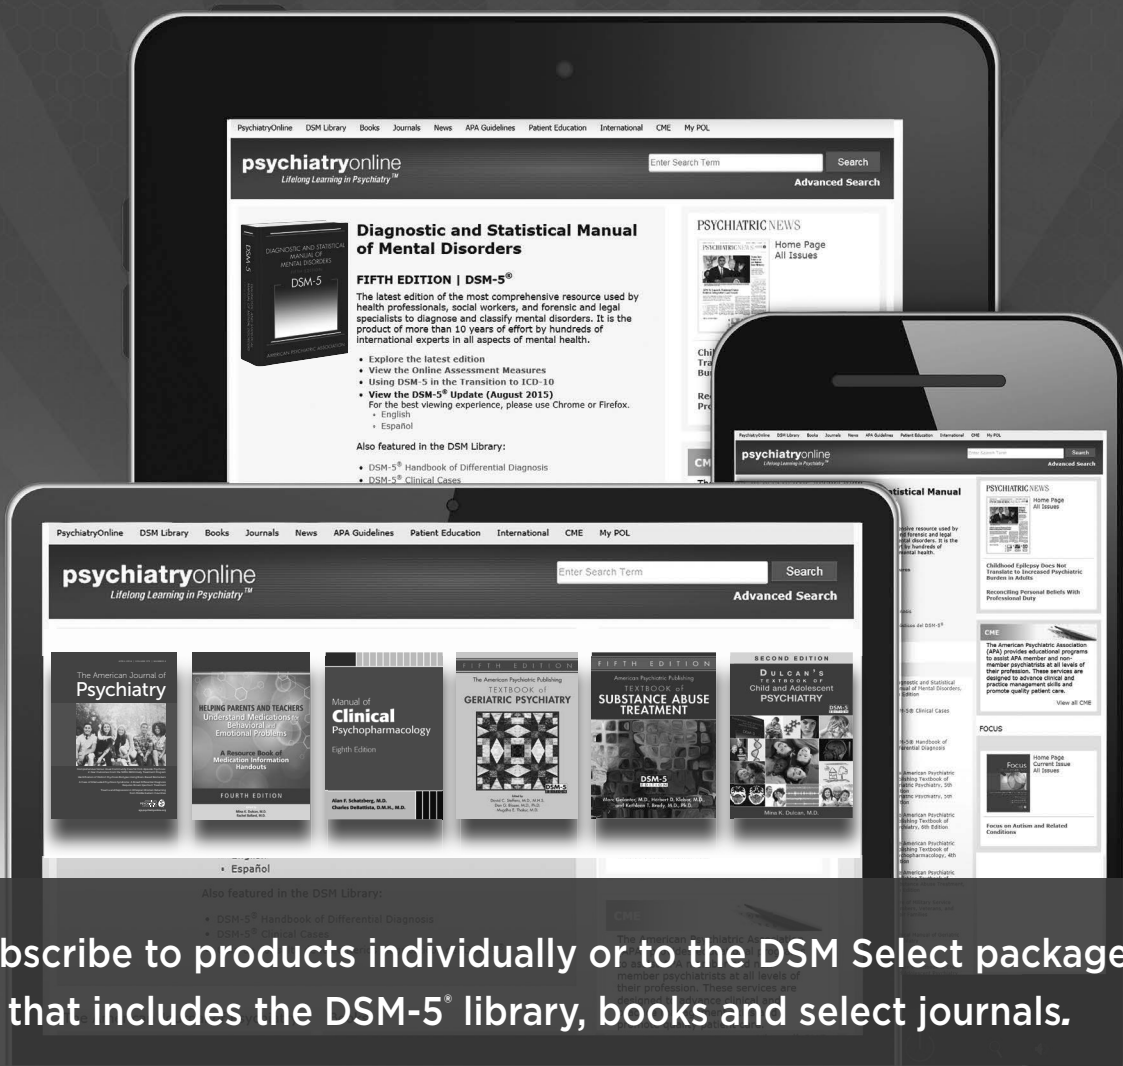

Subscribe to products individually or to the DSM Select package that includes the DSM-5® library, books and select journals.

**Go to [www.appi.org](http://www.appi.org) to subscribe.**

Institutional subscription options are available. For more information contact: [institutions@psych.org](mailto:institutions@psych.org); 800-368-5777 ext. 3720

AMERICAN  
PSYCHIATRIC  
ASSOCIATION  
PUBLISHING  
[www.appi.org](http://www.appi.org)

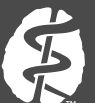

# The American Journal of Psychotherapy

[psychotherapy.psychiatryonline.org](http://psychotherapy.psychiatryonline.org)

Holly A. Swartz, M.D., Editor-in-Chief

*The American Journal of Psychotherapy* is a peer-reviewed, interdisciplinary journal published quarterly by the American Psychiatric Association. Begun in 1947 by the Association for the Advancement of Psychotherapy, *The American Journal of Psychotherapy* provides a forum for advancing the theory, science, and clinical practice of psychotherapy, publishing articles that expand the understanding of psychotherapies, especially in the domains of efficacy, process, education, and practice.

The journal publishes empirical papers on psychotherapy outcomes, process, measurement, and education. Maintaining a strong clinical focus, it welcomes case reports, review articles, and training tools that will guide and shape clinical practice.

*The American Journal of Psychotherapy* invites a broad range of perspectives from all psychotherapy disciplines, including but not limited to psychodynamic, interpersonal, cognitive- or dialectical-behavioral, existential, emotion-focused, problem-solving, mentalizing, mindfulness-based, and client-centered approaches.

*The American Journal of Psychotherapy* inclusively addresses topics across treatment modalities, age groups, genders, races and ethnicities, and diagnoses. The journal serves the international community by curating a vibrant, pluralistic, dialogue about psychotherapy that ultimately will inform clinical care.

**Subscribe Now!** .....

 **Visit [appi.org](http://appi.org) for pricing and more information!**

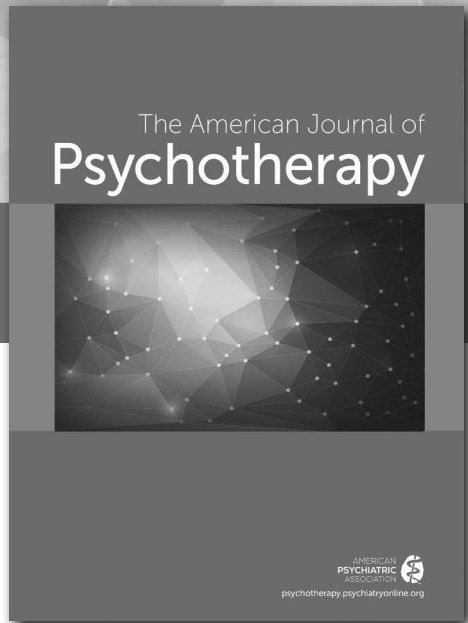

2018 • Vol. 73

Frequency: Quarterly

Online ISSN: 2575-6559

[psychotherapy.psychiatryonline.org](http://psychotherapy.psychiatryonline.org)

AMERICAN  
PSYCHIATRIC  
ASSOCIATION  
PUBLISHING

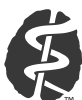

[appi.org](http://appi.org)  
1-800-368-5777  
[appi@psych.org](mailto:appi@psych.org)

[psychotherapy.psychiatryonline.org](http://psychotherapy.psychiatryonline.org)

AH2005A

# VCU Medical Center

Virginia Commonwealth University

## ADULT INPATIENT PSYCHIATRIST/DIVISION CHAIR Position F52380

The Department of Psychiatry at Virginia Commonwealth University (VCU) School of Medicine is seeking an accomplished and innovative Board Certified Psychiatrist to serve as Division Chair of its Adult Inpatient Services. This is an opportunity for a dynamic leader to help the Department of Psychiatry build collaborative relationships with clinicians, scientists, trainees, and students and to work across the university and externally. The successful candidate will have a leadership role in the department and hospital, reporting directly to the Department Chair. The incumbent will be expected to have administrative, leadership, teaching, and research experience. Resources will be available to the selected candidate to assist in building federally funded research studies/programs and recruiting other clinicians/investigators to the team. The successful candidate should have the vision and interest in helping VCU become a recognized leader in psychiatric care, scholarly activities, and research at the local, regional, national, and international level.

The core responsibilities of the Adult Inpatient Division Chair include, but are not limited to: managing and directing a 42-bed adult inpatient unit, supervising and training medical students, residents, and fellows, coordinating, developing and implementing best practices, some clinical duties, and developing/conducting research. Applicants should have a U.S. medical degree or equivalent (MD, MD/PhD, or DO), with licensure (or license eligible) to practice in the Commonwealth of Virginia and DEA licensure. Five to ten years of post-residency experience is required and fellowship training is preferred. Successful applicants will have demonstrated experience working in and fostering a diverse faculty, staff, and student environment, or commitment to do so as a faculty member at VCU.

Beginning in January 2020, Dr. Robert Findling will be VCU's Department of Psychiatry's Chair, who comes to us from Johns Hopkins. Dr. Findling's recruitment will serve as a catalyst for clinical growth as well as vigorous support for enhancement of scholarly activities both within the Adult Inpatient Division as well as the rest of the Department. VCU's Department of Psychiatry <http://psych.vcu.edu> employs over 60 full-time faculty and has well-funded research in genetics <http://www.vipbg.vcu.edu/>, addictions <http://www.idas.vcu.edu>, child and women's mental health, and psychopharmacology. VCU Psychiatry is ranked #19 by NIH for research funding and its residents and faculty are ranked #1 for teaching in VCU's School of Medicine. VCU is a large urban university with a robust health science campus and 750-bed university hospital. Richmond, the State Capital, has a moderate climate and a rich mix of history with modern facilities, excellent suburban housing, public/private schools, and a low cost of living.

This is an excellent opportunity for an experienced clinician with interests in academic psychiatry. Salary, rank, and tenure status are contingent upon the candidate's qualifications. Interested applicants should apply online at <https://www.vcujobs.com/postings/96831>. Only electronic applications will be accepted. All submitted applications must include a letter of interest and CV. Questions should be directed to Tammy Beltz, HR Manager at [Tammy.Beltz@VCUHEALTH.org](mailto:Tammy.Beltz@VCUHEALTH.org).

Virginia Commonwealth University is an equal opportunity, Affirmative Action University providing access to education and employment without regard to age, race, color, national origin, gender, religion, sexual orientation, veteran's status, political affiliation or disability.

*"With mental health, addictions and neurosciences being a prominent strategic focus for us, we are committed to building on our academic strengths,"*  
said Michael Rao, Ph.D., President of VCU and VCU Health System.

PSYCHIATRIC  
NEWS

BRIEF

Enable

## Psychiatric News Brief

With the American Psychiatric Association's new flash briefing, *Psychiatric News Brief*, you can now listen to synopses of curated articles from *Psychiatric News*. Simply enable this skill and you can listen anytime you choose throughout your day by just saying "Alexa, what's my flash briefing" or "Alexa, tell me what's new".

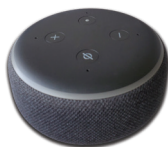

Flash briefing is a customizable Amazon skill that includes updates from your favorite content services. When you say, "Alexa, what's my flash briefing?" or "Alexa, what's the news," you'll hear updates from any organization that you have enabled.

Go to [psychnews.psychiatryonline.org/alexa](http://psychnews.psychiatryonline.org/alexa) to sign up now!

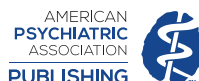

[www.appi.org](http://www.appi.org)  
Email: [appi@psych.org](mailto:appi@psych.org)  
Phone: 1-800-368-5777

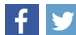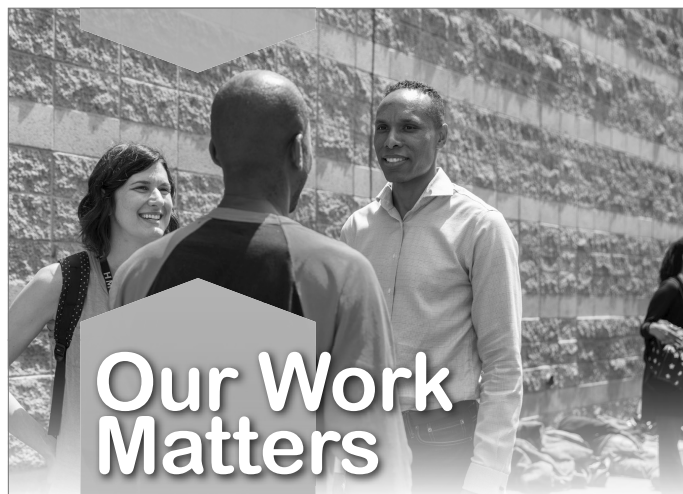

## Our Work Matters

Make a  
**DIFFERENCE**  
for those  
who need it  
**THE MOST.**

VISIT:  
**Psychiatristjobs.la**

- Join the largest and most dynamic mental health department in the country
- Multiple avenues for advancement and professional development
- Flexible work schedules
- Unparalleled work-life balance
- Highly competitive benefits
- Competitive salary with potential bonuses of up to **\$32,000 annually**
- Student loan repayment incentive of up to **\$250,000**
- Reimbursement of eligible relocation costs of up to **\$15,000**

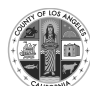

LOS ANGELES COUNTY  
**DEPARTMENT OF  
MENTAL HEALTH**  
hope. recovery. wellbeing.



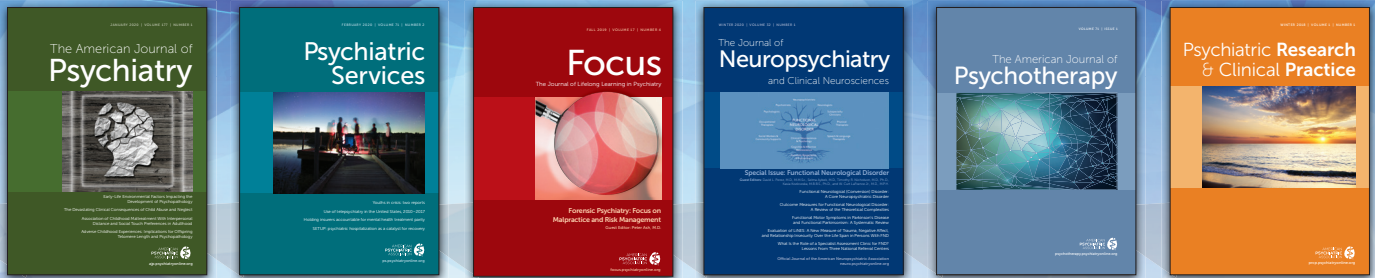

## More Ways to Engage Beyond Reading a Page

The journals of American Psychiatric Association Publishing are leading contributors to the literature. Our articles advance understanding of all aspects of mental and behavioral disorders and their treatment. With close to 10 million page views of journal content annually, APA Publishing's journals reach audiences at more than 2,000 U.S. and international institutions, a figure that includes nearly 100% of U.S. medical schools and hospitals.

APA Publishing is committed to discovery of journal articles and offers several ways to access journal content on the **PsychiatryOnline** knowledge portal, ensuring that practitioners can keep up with the latest findings in the manner they prefer.

### PODCASTS

Each episode brings you an in-depth look at articles featured in that month's issue. Lively discussion and wide-ranging interviews with authors cover the background, rationale, main findings, and future implications of the research.

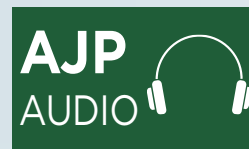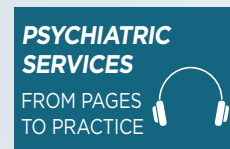

### AUDIO SYNOPSES

Prepared in collaboration with *Psychiatric News*, these audio synopses accompany the online article and can be accessed as a skill through Amazon's Alexa app.

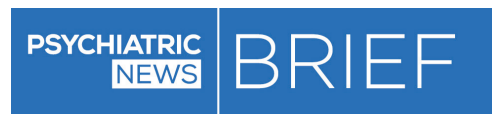

### CURATED COLLECTIONS

These collections of recent and seminal research in a given area can be used as a launch point for authors conducting literature reviews and for educators working on course content. Curated **Editor's Choice** collections from *Psychiatric Services* are currently available.

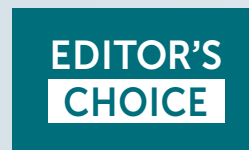

### ALERTS

Keep up with all of the latest research being published by signing up to receive **Publication Alerts** and following on Twitter @APAPubJournals.

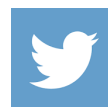

### GET INVOLVED!

We also encourage active contributions to our journals. Submit your research for publication consideration at one of our peer-reviewed titles. Even if you don't have a paper at present, visit our submission site and set up your reviewer account so that you have a say in future contributions to the literature.

[psychiatryonline.org/journals](http://psychiatryonline.org/journals)

Subscribe @ [www.appi.org](http://www.appi.org) • Email: [appi@psych.org](mailto:appi@psych.org) • Toll Free: 1-800-368-5777

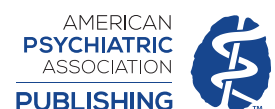

Source: https://psychiatryonline.org/doi/suppl/10.1176/ps.2020.71.issue-5/suppl_file/back.pdf
