# Psychiatric Services

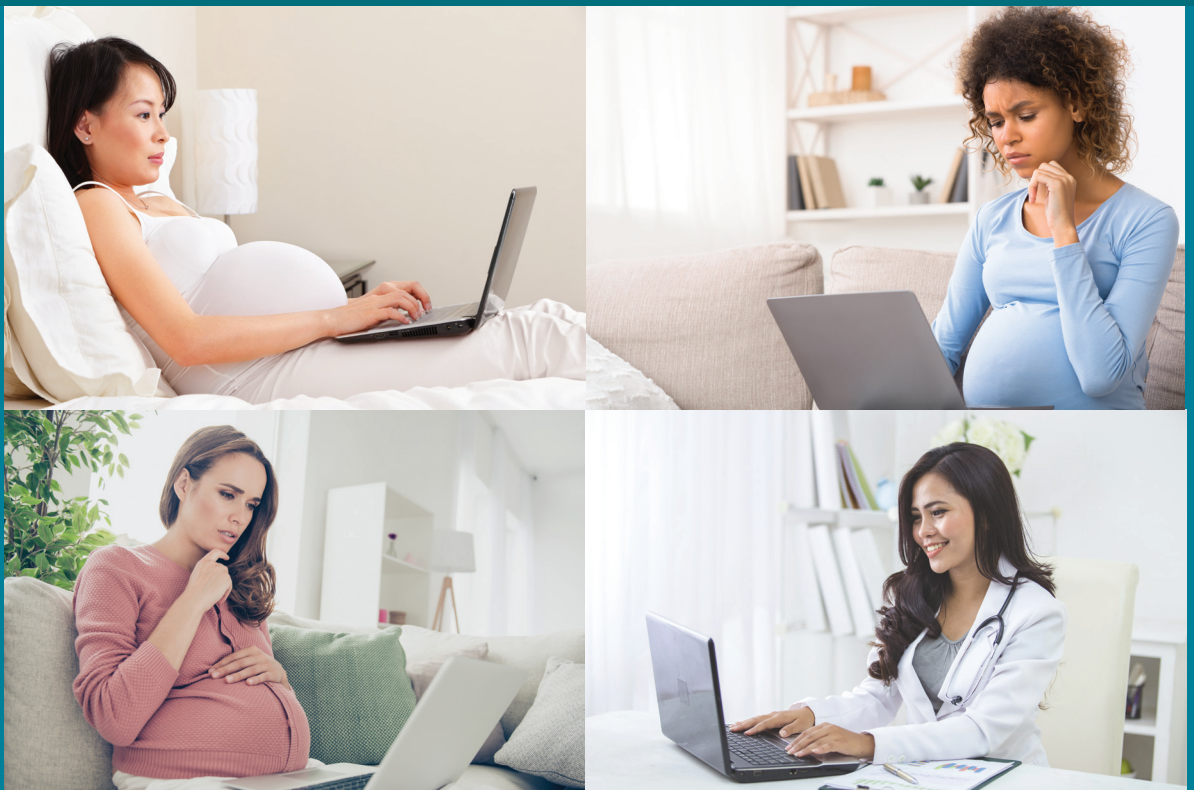

Telepsychiatry: implementation and use for perinatal care

Viewpoint: An update from Dr. McCance-Katz on SAMHSA reforms

Coordinated specialty care: postdischarge concerns of providers and clients

Personal Account: A story of recovery
