# Psychiatric Services

A Journal of the American Psychiatric Association

*Psychiatric Services*, established in 1950, is published monthly by the American Psychiatric Association for mental health professionals and others concerned with treatment and services for persons with mental illnesses and mental disabilities, in keeping with APA's objectives to improve care and treatment, to promote research and professional education in psychiatric and related fields, and to advance the standards of all psychiatric services and facilities.

## Mailing Address

*Psychiatric Services*  
American Psychiatric Association  
800 Maine Ave., S.W., Suite 900  
Washington, DC 20024  
Email: [psjournal@psych.org](mailto:psjournal@psych.org)

## Editor

Lisa B. Dixon, M.D., M.P.H.

## Editorial Board

Regina Bussing, M.D., M.S.H.S.  
Robert J. Hilt, M.D.  
Marcela Horvitz-Lennon, M.D., M.P.H.  
Hunter L. McQuiston, M.D.  
Jeanne Miranda, Ph.D.  
Ramin Mojtabai, M.D., Ph.D.  
Mark R. Munetz, M.D.  
Mark Olfson, M.D., M.P.H.  
David W. Oslin, M.D.  
Rebecca C. Rossom, M.D., M.S.  
Jason Schiffman, Ph.D.  
Ruth S. Shim, M.D., M.P.H.  
T. Scott Stroup, M.D., M.P.H.  
Lawrence Wissow, M.D., M.P.H.

## Contributing Editors

*Case Studies in Public-Sector Leadership*  
Jules M. Ranz, M.D., and Stephanie Le Melle, M.D.

*Culture & Mental Health Services*  
Roberto Lewis-Fernández, M.D.

*Datapoints*  
Tami L. Mark, Ph.D., and Alexander J. Cowell, Ph.D.

*Economic Grand Rounds*  
Steven S. Sharfstein, M.D., Haiden A. Huskamp, Ph.D., and Alison Evans Cuellar, Ph.D.

*From Pages to Practice* podcast  
Josh Berezin, M.D., M.S.

*Frontline Reports*  
Francine Cournos, M.D., and Stephen M. Goldfinger, M.D.

*Global Mental Health Reforms*  
Kathleen M. Pike, M.D., and Pamela Scorza, Sc.D., M.P.H.

*Integrated Care*  
Benjamin G. Druss, M.D., M.P.H., and Gail L. Daumit, M.D., M.H.S.

*Law & Psychiatry*  
Paul S. Appelbaum, M.D.

*Personal Accounts*  
Patricia E. Deegan, Ph.D., and William C. Torrey, M.D.

*Promoting High-Value Mental Health Care*  
Marcela Horvitz-Lennon, M.D., M.P.H., and Kenneth Minkoff, M.D.

*Research, Community, & Services Partnerships*  
Debra A. Pinals, M.D., and Marcia Valenstein, M.D., M.S.

## Social Determinants of Mental Health

Ruth S. Shim, M.D., M.P.H., and Michael T. Compton, M.D., M.P.H.

*State Mental Health Policy*  
Marvin S. Swartz, M.D.

*Technology in Mental Health*  
Dror Ben-Zeev, Ph.D.

## Early-Career Psychiatrist Advisory Committee

Hector Colon-Rivera M.D., M.R.O.  
Ayana Jordan, M.D., Ph.D.  
Misty C. Richards, M.D., M.S.  
Stephanie A. Rolin, M.D.  
Rishi Sawhney, M.D.

*Collections Editors:* Carrie Cunningham, M.D., M.P.H., and Matthew L. Goldman, M.D., M.S.

## Editors Emeriti

Howard H. Goldman, M.D., Ph.D.  
John A. Talbott, M.D.

## Statistical Consultant

Melanie M. Wall, Ph.D.

## Editorial Consultants

Dixon Chibanda, M.D., M.P.H.  
Shirley M. Glynn, Ph.D.  
Judith Weissman, Ph.D., J.D.

## Editorial Staff

Demarie S. Jackson  
*Managing Editor*  
Brendan Missett  
*Staff Editor*  
Wendy Lieberman Taylor  
*Production Manager*  
Heidi A. Koch-Bubel  
*Editorial Support Services Manager*

## Publisher

John McDuffie

## Editorial Director, Journals

Michael D. Roy

## American Psychiatric Association

Jeffrey Geller, M.D., M.P.H.  
*President*  
Vivian Pender, M.D.  
*President-Elect*  
Saul Levin, M.D., M.P.A.  
*Chief Executive Officer and Medical Director*
